# Supplementary material for: Morphology-controlled MnO2 modified silicon diatoms for high-performance asymmetric supercapacitors
Source: Royal Society of Chemistry journal article supplement (doi:10.1039/c6ta11210b), 2017-01-01

## Supplementary information

**Fig. S1. Inner image of silicon diatom@MnO<sub>2</sub> nanosheets.**

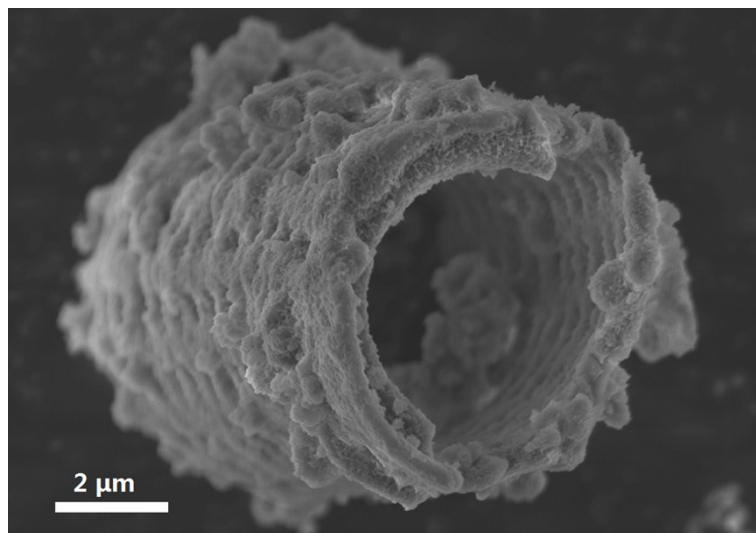

Fig. S2. FTIR spectra of silica and silicon diatoms before (a) and after (b) magnesiothermic reduction showing Si-O-Si stretching peak at  $1100\text{ cm}^{-1}$  and Si-H stretching around  $2100\text{ cm}^{-1}$  respectively.

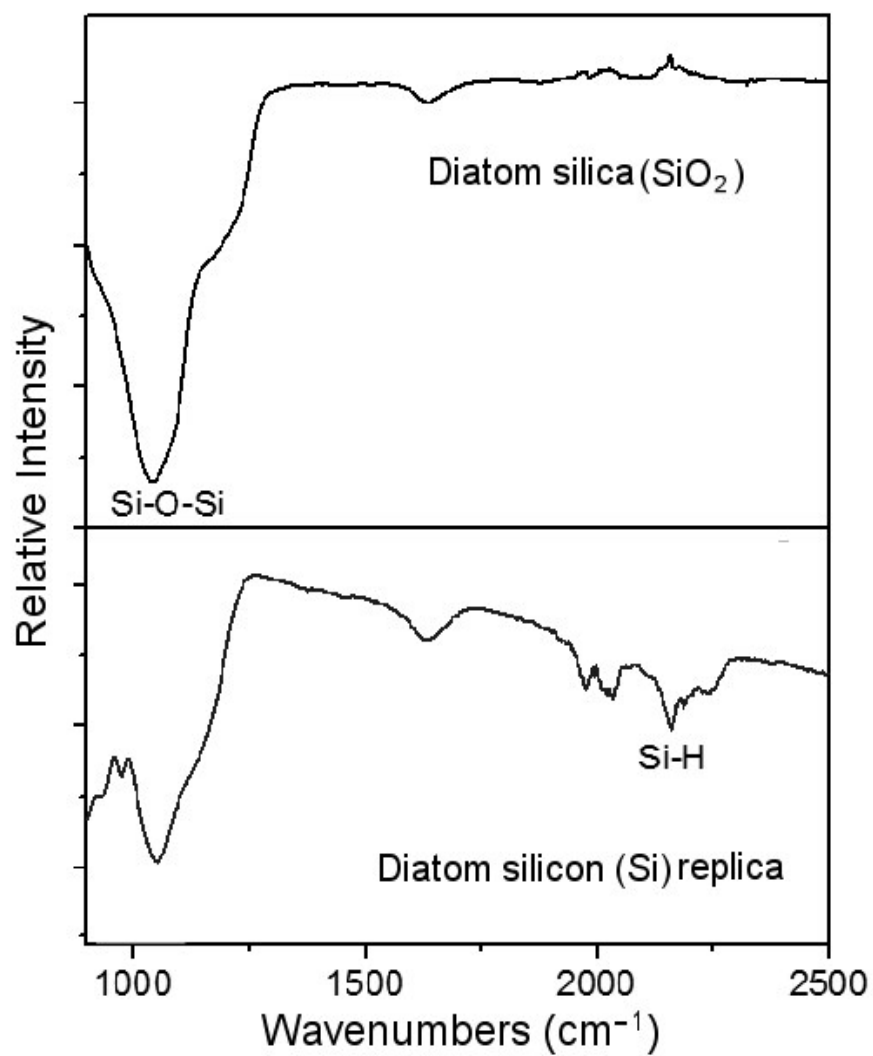

**Fig. S3.** Digital image of a green light-emitting diode (LED) lighted by the as-prepared ASC device.

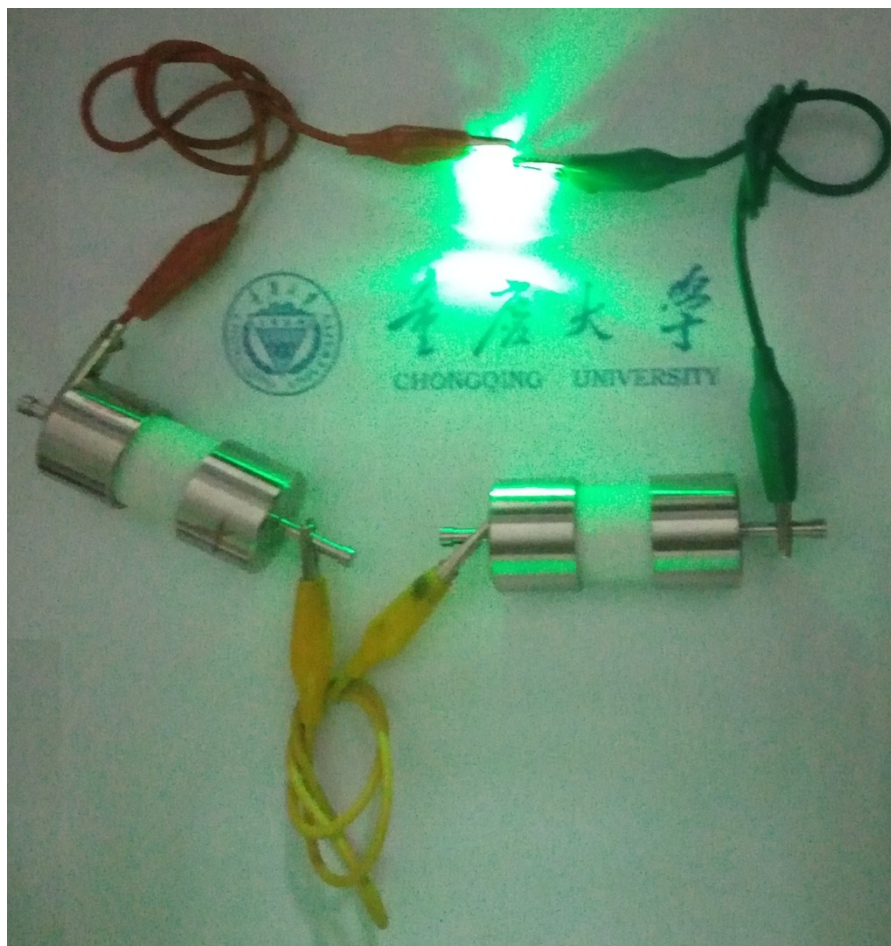

Supplement: c6ta11210b1.pdf [file c6ta11210b1.pdf]
